# Supplementary material for: Rapid electron/ion transport in CNT/LiTi2(PO4)3@C–N electrodes for aqueous lithium-ion batteries with high stability, flexibility and safety
Source: Royal Society of Chemistry journal article supplement (doi:10.1039/d1qi01577j), 2022-01-01
Supplement: d1qi01577j1.pdf [file d1qi01577j1.pdf]

## Rapid Electron/Ion Transport in CNT/LiTi<sub>2</sub>(PO<sub>4</sub>)<sub>3</sub>@C-N Electrodes for Aqueous Lithium-ion Batteries with High Stability, Flexibility and Safety

Jun Lin,<sup>a</sup> Zhigang Zhang,<sup>a</sup> Fangfang Xue,<sup>a</sup> Deng Long,<sup>a</sup> Qihong Li<sup>\*a</sup>

<sup>a</sup> Pen-Tung Sah Institute of Micro-Nano Science and Technology, Xiamen University, Xiamen, 361005, PR China.

\* Corresponding authors.

*E-mail addresses:* [liqihong@xmu.edu.cn](mailto:liqihong@xmu.edu.cn)

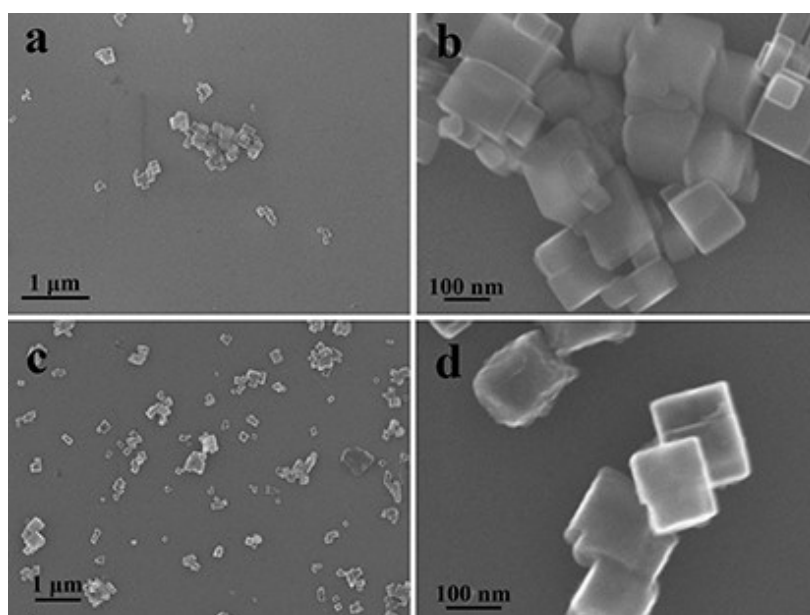

**Fig. S1** SEM images of LTP (a, b) and LTP@C-N nanoparticles (c, d).

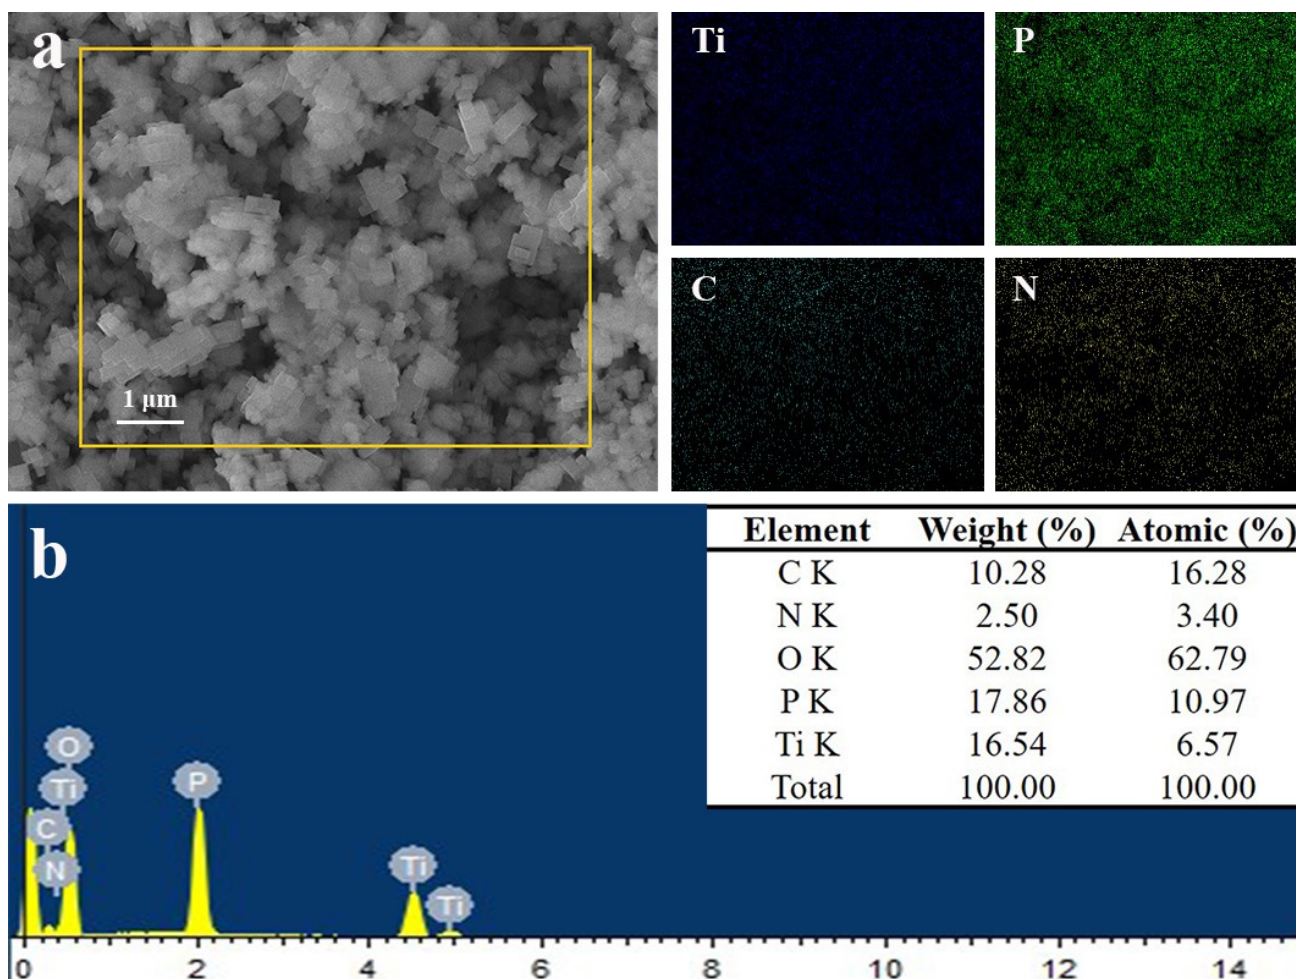

**Fig. S2** (a) SEM image and corresponding element mapping images of Ti, P, C and N. (b) EDS spectrum of the LTP@C-N nanoparticles.

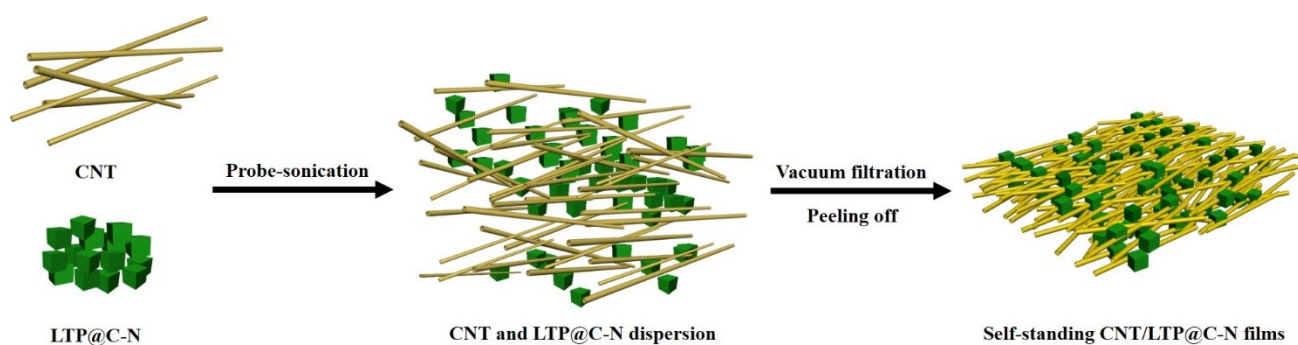

**Fig. S3** Schematic illustration of the self-standing CNT/LTP@C-N films' preparation process.

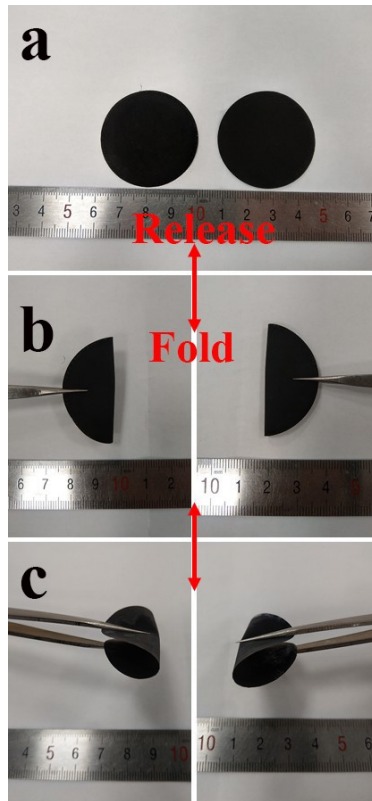

**Fig. S4** Images of the CNT/LTP@C-N films before and after bending and folding.

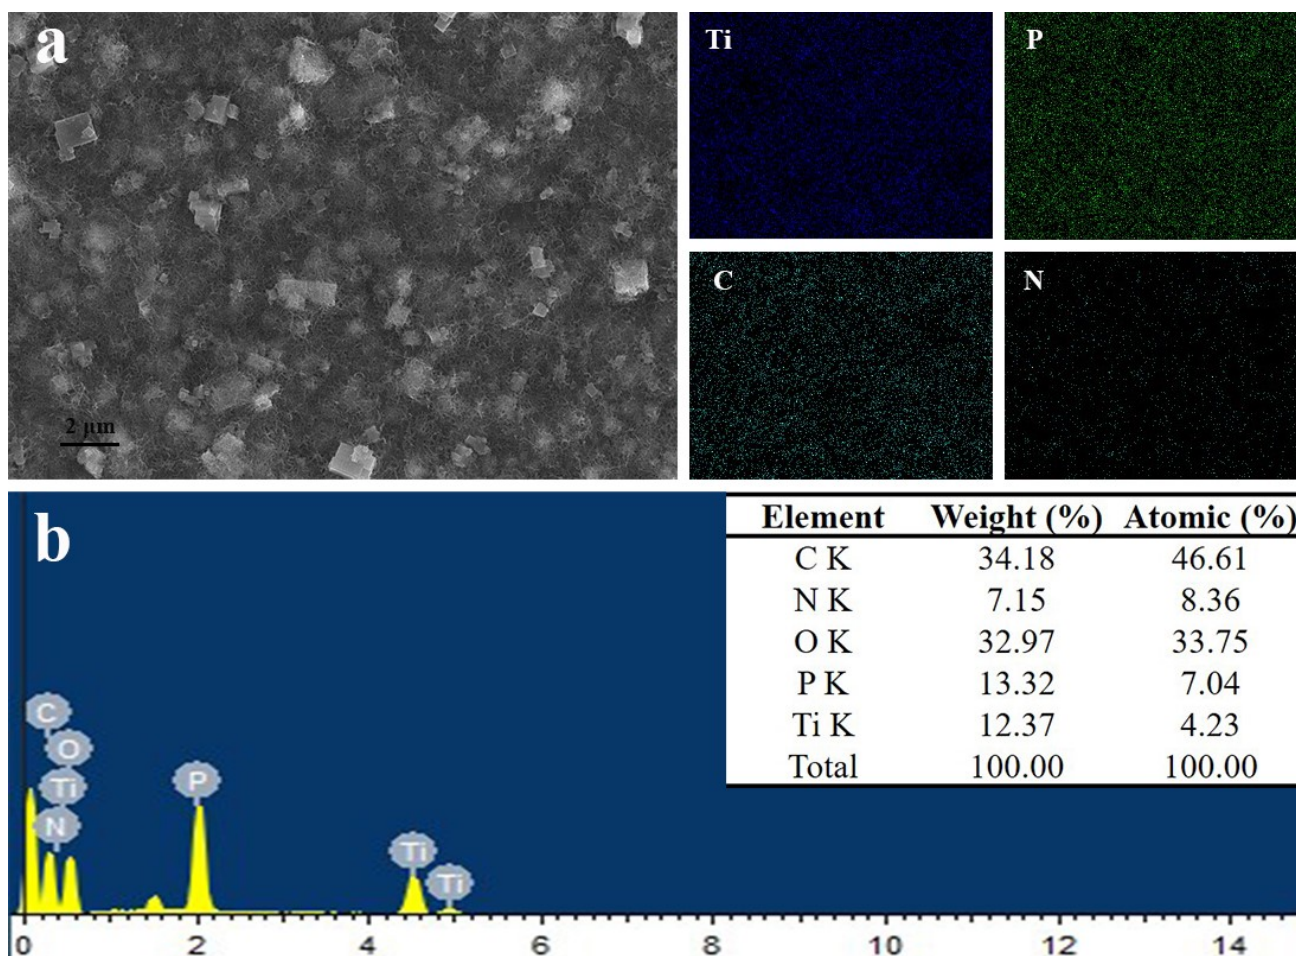

**Fig. S5** (a) SEM image and corresponding element mapping images of CNT/LTP@C-N film from a sectional view. (b) EDS spectrum of CNT/LTP@C-N sample. The LTP@C-N particles uniformly distribute across the conductive and intertwined CNT network. Across the CNT/LTP@C-N film, Ti, P, C and N elements distribute evenly.

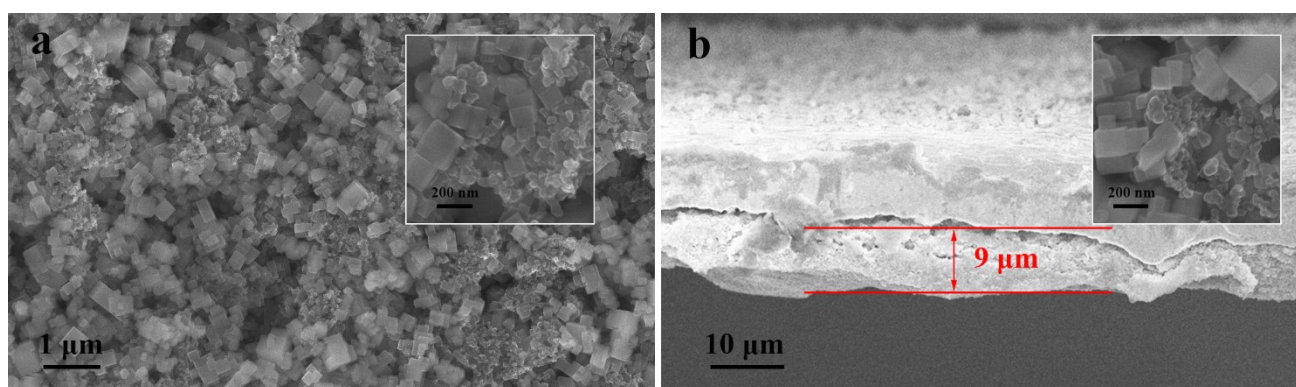

**Fig. S6** (a) Top-view and (b) side-view FESEM images of the LTP electrode prepared by a conventional slurry coating method onto Cu foil. The insets in (a, b) are the enlarged region of the corresponding areas.



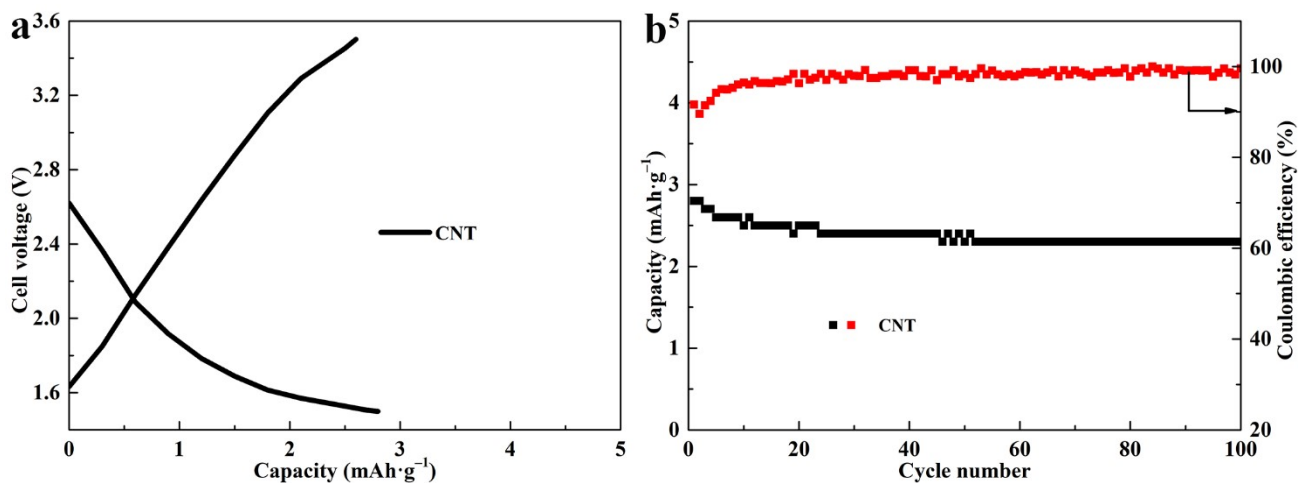

**Fig. S7** (a) Charge/discharge profiles of CNT at 1 C ( $1\text{ C}=140\text{ mA g}^{-1}$ ). (b) The cycle performance of CNT at 1 C in organic electrolyte.

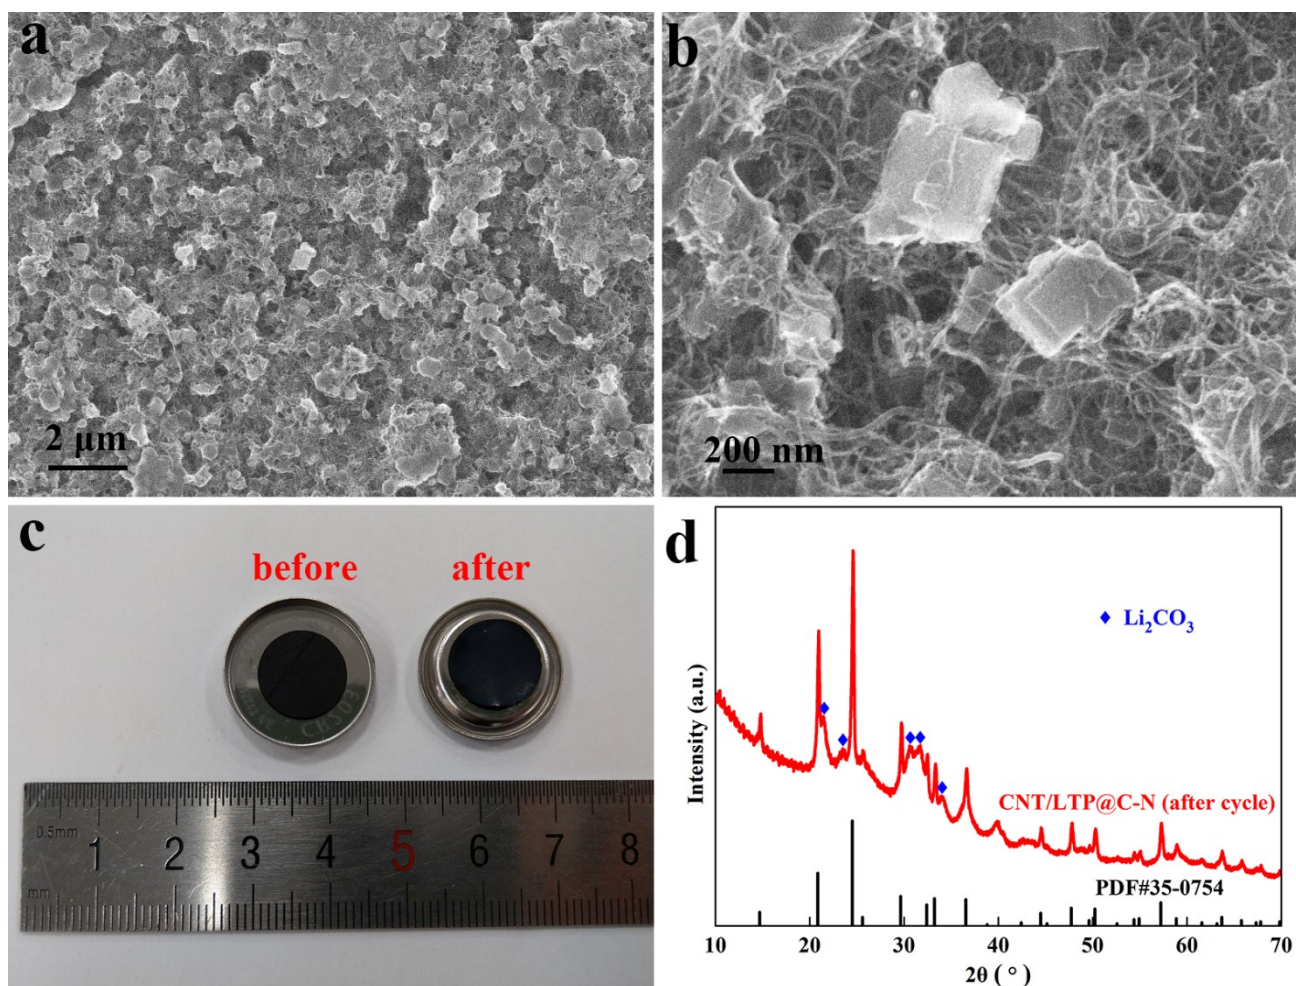

**Fig. S8** The morphology and phase of the CNT/LTP@C-N free-standing electrode after cycles: (a) low-magnification and (b) high-magnification SEM images. (c) Photograph, showing good structural integrity. (d) XRD pattern.

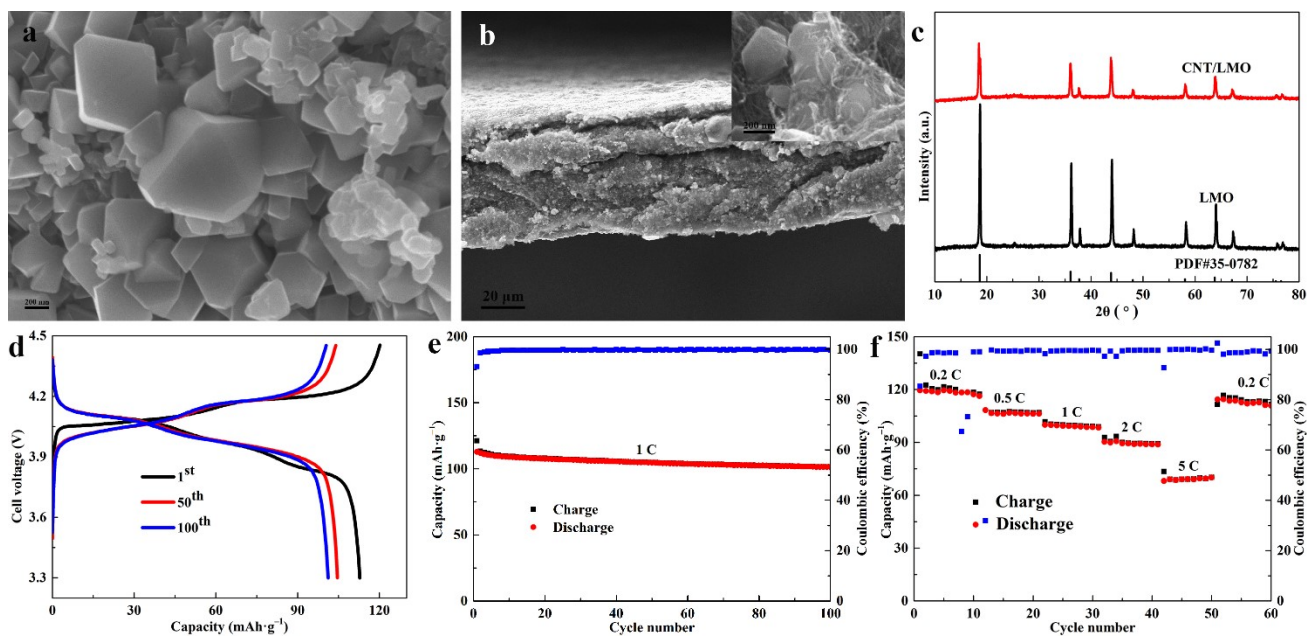

**Fig. S9** (a, b) SEM images of the as-prepared LMO and CNT/LMO samples. (c) XRD pattern. (d) Charge/discharge profiles of CNT/LMO cathode at 1 C (1 C=148  $\text{mA}\cdot\text{g}^{-1}$ ). (e) The cycle performance of CNT/LMO at 1 C. (f) Rate performance in organic electrolyte.

**Table S1.** The data of LTP, LTP@C-N and CNT/LTP@C-N based on the equivalent circuit.

| sample      | $R_s(\Omega)$ | $R_{ct}(\Omega)$ | $R_{SEI}(\Omega)$ |
|-------------|---------------|------------------|-------------------|
| LTP         | 4.922         | 286.6            | 86.89             |
| LTP@C-N     | 6.004         | 119.1            | 24.43             |
| CNT/LTP@C-N | 3.95          | 32.32            | /                 |

**Table S2.** Comparison of the electrochemical performance of LTP-based anode materials for LIBs.

| LTP anode materials                                                        | Rate Capability        |                           | Cycle performance              |                    |
|----------------------------------------------------------------------------|------------------------|---------------------------|--------------------------------|--------------------|
|                                                                            | C-rates                | Specific Capacity (mAh/g) | Cycle life at different C-rate | Capacity retention |
| rGO-LTP hybrid <sup>[1]</sup>                                              | 1 C                    | 123                       | 100 cycles @10 C               | 92 %               |
|                                                                            | 50 C                   | 83                        |                                |                    |
| Sn-doped $\text{LiTi}_2(\text{PO}_4)_3/\text{C}$ nanofibers <sup>[2]</sup> | 100 mA g <sup>-1</sup> | 111                       | /                              | /                  |
|                                                                            | 2 A g <sup>-1</sup>    | 102                       |                                |                    |
| $\text{LiTi}_2(\text{PO}_4)_3@\text{N-C}$ Composite <sup>[3]</sup>         | 20 C                   | 120                       | 1000 cycles@10 C               | 89.5 %             |
|                                                                            | 50 C                   | 87                        |                                |                    |
| $\text{LiTi}_2(\text{PO}_4)_3/\text{C}$ <sup>[4]</sup>                     | 1 C                    | 125.6                     | 1000 cycles@5 C                | 94.4 %             |
|                                                                            | 10 C                   | 92.5                      | 1000 cycles@20 C               | 80.4 %             |
| $\text{LiTi}_2(\text{PO}_4)_3/\text{C}$ <sup>[5]</sup>                     | 0.1 C                  | 133.8                     | 500 cycles@5 C                 | 97.7 %             |
|                                                                            | 100 C                  | 20                        |                                |                    |
| $\text{LiTi}_2(\text{PO}_4)_{2.88}\text{F}_{0.12}$ <sup>[6]</sup>          | 10 C                   | 107                       | 1000 cycles@10 C               | 87.8 %             |
|                                                                            | 40 C                   | 90                        |                                |                    |
| $\text{LiTi}_2(\text{PO}_4)_3/\text{C}$ <sup>[7]</sup>                     | 1 C                    | 114                       | 1000 cycles@10 C               | 90 %               |
|                                                                            | 20 C                   | 84                        |                                |                    |
| $\text{LiTi}_2(\text{PO}_4)_3/\text{C}$ <sup>[8]</sup>                     | 0.5 C                  | 109.8                     | 2000 cycles@10 C               | 85 %               |
|                                                                            | 20 C                   | 84.4                      |                                |                    |
| $\text{LiTi}_2(\text{PO}_4)_3/\text{CNT}$ <sup>[9]</sup>                   | 0.05 C                 | 133.8                     | 200 cycles@0.1 C               | 96.2 %             |
| CNT/LTP@C-N (This work)                                                    | 1 C                    | 143                       | 200 cycles@1 C                 | 93.4 %             |
|                                                                            | 30 C                   | 85                        | 1500 cycles@5 C                | 87.3 %             |

**Table S3.** Comparison of the electrochemical performance of the state-of-the-art aqueous lithium-ion batteries.

| LTP anode materials                                                                                   | Rate Capability       |                              | Cycle performance                   |                    |
|-------------------------------------------------------------------------------------------------------|-----------------------|------------------------------|-------------------------------------|--------------------|
|                                                                                                       | C-rates               | Specific Capacity<br>(mAh/g) | Cycle life at different<br>C-rate   | Capacity retention |
| VO <sub>2</sub> (B)/C//LiMn <sub>2</sub> O <sub>4</sub> <sup>[10]</sup>                               | /                     | /                            | 25 cycles @0.69 mA cm <sup>-2</sup> | Failed             |
| LiTi <sub>2</sub> (PO <sub>4</sub> ) <sub>3</sub> //LiFePO <sub>4</sub> <sup>[11]</sup>               | 1 C                   | 55                           | 1000 cycles @1 C                    | 90 %               |
| Mo <sub>6</sub> S <sub>8</sub> //LiMn <sub>2</sub> O <sub>4</sub> <sup>[12]</sup>                     | 0.15 C                | 40                           | 1000 cycles @4.5 C                  | 72 %               |
|                                                                                                       | 4.5 C                 | 30                           |                                     |                    |
| Mo <sub>6</sub> S <sub>8</sub> //LiNi <sub>0.5</sub> Mn <sub>1.5</sub> O <sub>4</sub> <sup>[13]</sup> | 0.15 C                | 30                           | 400 cycles @5 C                     | 70 %               |
|                                                                                                       | 4.5 C                 | 17                           |                                     |                    |
| Mo <sub>6</sub> S <sub>8</sub> //LiCoO <sub>2</sub> <sup>[14]</sup>                                   | 0.5 C                 | 60                           | 1000 cycles @2.5 C                  | 87 %               |
|                                                                                                       | 2.5 C                 | 38                           |                                     |                    |
| LiFePO <sub>4</sub> //LiFePO <sub>4</sub> <sup>[15]</sup>                                             | 0.5 C                 | 116                          | 500 cycles @1.1 C                   | 80 %               |
|                                                                                                       | 5 C                   | 50                           |                                     |                    |
| LiV <sub>3</sub> O <sub>8</sub> //LiMn <sub>2</sub> O <sub>4</sub> <sup>[16]</sup>                    | 0.1 A g <sup>-1</sup> | 32                           | 500 cycles @0.5 A g <sup>-1</sup>   | 80 %               |
| LiVPO <sub>4</sub> F//LiVPO <sub>4</sub> F <sup>[17]</sup>                                            | 2 C                   | 58.1                         | 4000 cycles @20 C                   | 87 %               |
|                                                                                                       | 60 C                  | 40.8                         |                                     |                    |
| LiTi <sub>2</sub> (PO <sub>4</sub> ) <sub>3</sub> //LiCoO <sub>2</sub> <sup>[18]</sup>                | 1 C                   | 130.3                        | 2000 cycles @1 C                    | 86 %               |
|                                                                                                       | 50 C                  | 112.1                        |                                     |                    |
| LiTi <sub>2</sub> (PO <sub>4</sub> ) <sub>3</sub> //LiMn <sub>2</sub> O <sub>4</sub> <sup>[19]</sup>  | 1 C                   | 105                          | 120 cycles @1 C                     | 80.6 %             |
|                                                                                                       | 10 C                  | 89                           | 120 cycles @10 C                    | 97 %               |
| LiTi <sub>2</sub> (PO <sub>4</sub> ) <sub>3</sub> //LiMn <sub>2</sub> O <sub>4</sub> <sup>[3]</sup>   | 1 C                   | 123                          | 100 cycles @0.22 C                  | 91.2 %             |
|                                                                                                       | 10 C                  | 103                          | 400 cycles @1.08 C                  | 90.4 %             |
| CNT/LTP@C-N//LiMn <sub>2</sub> O <sub>4</sub>                                                         | 1 C                   | 126.5                        | 200 cycles @1 C                     | 96.3 %             |
| (This work)                                                                                           | 15 C                  | 57                           | 1000 cycles @3 C                    | 70.2 %             |



## References

- 1 C.H. Lim, A.G. Kannan, H.W. Lee, D.K. Kim, A high power density electrode with ultralow carbon via direct growth of particles on graphene sheets, *J. Mater. Chem. A*, 2013, **1**, 6183-6190.
- 2 L. Liu, T. Song, H. Han, H. Park, J. Xiang, Z. Liu, Y. Feng, U. Paik, Electrospun Sn-doped  $\text{LiTi}_2(\text{PO}_4)_3/\text{C}$  nanofibers for ultra-fast charging and discharging, *J. Mater. Chem. A*, 2015, **3**, 10395-10402.
- 3 D. Sun, X. Xue, Y. Tang, Y. Jing, B. Huang, Y. Ren, Y. Yao, H. Wang, G. Cao, High-Rate  $\text{LiTi}_2(\text{PO}_4)_3@/\text{N-C}$  Composite via Bi-nitrogen Sources Doping, *ACS Appl. Mater. Interfaces*, 2015, **7**, 28337-28345.
- 4 J. Sun, Y. Sun, L. Gai, H. Jiang, Y. Tian, Carbon-coated mesoporous  $\text{LiTi}_2(\text{PO}_4)_3$  nanocrystals with superior performance for lithium-ion batteries, *Electrochim. Acta*, 2016, **200**, 66-74.
- 5 S. Yu, H. Tempel, R. Schierholz, O. Aslanbas, X. Gao, J. Mertens, L.G.J. de Haart, H. Kungl, R.A. Eichel,  $\text{LiTi}_2(\text{PO}_4)_3/\text{C}$  Anode Material with a Spindle-Like Morphology for Batteries with High Rate Capability and Improved Cycle Life, *ChemElectroChem*, 2016, **3**, 1157-1169.
- 6 H. Wang, H. Zhang, Y. Cheng, K. Feng, X. Li, H. Zhang, Rational design and synthesis of  $\text{LiTi}_2(\text{PO}_4)_{3-x}\text{F}_x$  anode materials for high-performance aqueous lithium ion batteries, *J. Mater. Chem. A*, 2017, **5**, 593-599.
- 7 W. Sun, J. Liu, X. Liu, X. Fan, K. Zhou, X. Wei, Bimolecular-induced hierarchical nanoporous  $\text{LiTi}_2(\text{PO}_4)_3/\text{C}$  with superior high-rate and cycling performance, *ChemComm*, 2017, **53**, 8703-8706.
- 8 M. Li, L. Liu, N. Zhang, S. Nie, Q. Leng, J. Xie, Y. Ouyang, J. Xia, Y. Zhang, F. Cheng, X. Wang, Mesoporous  $\text{LiTi}_2(\text{PO}_4)_3/\text{C}$  composite with trace amount of carbon as high-performance electrode materials for lithium ion batteries, *J. Alloys Compd.*, 2018, **749**, 1019-1027.
- 9 S. Yu, Q. Xu, C.L. Tsai, M. Hoffmeyer, X. Lu, Q. Ma, H. Tempel, H. Kungl, H.D. Wiemhoefer, R.A. Eichel, Flexible All-Solid-State Li-Ion Battery Manufacturable in Ambient Atmosphere, *ACS Appl. Mater. Interfaces*, 2020, **12**, 37067-37078.
- 10 W. Li, J.R. Dahn, D.S. Wainwright, Rechargeable lithium batteries with aqueous electrolytes, *Science*, 1994, **264**, 1115-1118.
- 11 J. Y. Luo, W. J. Cui, P. He, Y. Y. Xia, Raising the cycling stability of aqueous lithium-ion batteries by eliminating oxygen in the electrolyte, *Nat. Chem.*, 2010, **2**, 760-765.
- 12 L. Suo, O. Borodin, T. Gao, M. Olguin, J. Ho, X. Fan, C. Luo, C. Wang, K. Xu, "Water-in-salt" electrolyte enables high-voltage aqueous lithium-ion chemistries, *Science*, 2015, **350**, 938-943.
- 13 F. Wang, L. Suo, Y. Liang, C. Yang, F. Han, T. Gao, W. Sun, C. Wang, Spinel  $\text{LiNi}_{0.5}\text{Mn}_{1.5}\text{O}_4$  Cathode for High-Energy Aqueous Lithium-Ion Batteries, *Adv. Energy Mater.*, 2017, **7**, 1600922.
- 14 F. Wang, Y. Lin, L. Suo, X. Fan, T. Gao, C. Yang, F. Han, Y. Qi, K. Xu, C. Wang, Stabilizing high voltage  $\text{LiCoO}_2$  cathode in aqueous electrolyte with interphase-forming additive, *Energy Environ. Sci.*, 2016, **9**, 3666-3673.
- 15 D. Gordon, M.Y. Wu, A. Ramanujapuram, J. Benson, J.T. Lee, A. Magasinski, N. Nitta, C. Huang, G. Yushin, Enhancing Cycle Stability of Lithium Iron Phosphate in Aqueous Electrolytes by Increasing Electrolyte Molarity, *Adv. Energy Mater.*, 2016, **6**, 1501805.
- 16 Z. Liu, H. Li, M. Zhu, Y. Huang, Z. Tang, Z. Pei, Z. Wang, Z. Shi, J. Liu, Y. Huang, C. Zhi, Towards wearable electronic devices: A quasi-solid-state aqueous lithium-ion battery with outstanding stability, flexibility, safety and breathability, *Nano Energy*, 2018, **44**, 164-173.
- 17 C. Yang, X. Ji, X. Fan, T. Gao, L. Suo, F. Wang, W. Sun, J. Chen, L. Chen, F. Han, L. Miao, K. Xu, K. Gerasopoulos, C. Wang, Flexible Aqueous Li-Ion Battery with High Energy and Power Densities, *Adv. Mater.*, 2017, **29**, 1701972.
- 18 L. Xue, Q. Zhang, X. Zhu, L. Gu, J. Yue, Q. Xia, T. Xing, T. Chen, Y. Yao, H. Xia, 3D  $\text{LiCoO}_2$  nanosheets assembled nanorod arrays via confined dissolution-recrystallization for advanced aqueous lithium-ion batteries,

Nano Energy, 2019, **56**, 463-472.

- 19 Z. Liu, X. Qin, H. Xu, G. Chen, One-pot synthesis of carbon-coated nanosized  $\text{LiTi}_2(\text{PO}_4)_3$  as anode materials for aqueous lithium ion batteries, J. Power Sour., 2015, **293**, 562-569.
